# Supplementary material for: The impact of direct-to-consumer personal genomic testing on perceived risk of breast, prostate, colorectal, and lung cancer: findings from the PGen study
Source: PubMed Central journal article supplement (PMC4606558; doi:10.1186/s12920-015-0140-y), 2015-10-15
Supplement: 12920_2015_140_MOESM1_ESM.pdf [file 12920_2015_140_MOESM1_ESM.pdf]

**The impact of personal genomic testing  
on perceived risk of breast, prostate, colorectal, and lung cancer:  
Findings from the PGen Study**

Carere et al.

*Supplemental Materials*

**Table S1.** SNPs included in commercial personal genomic testing panels for cancer risk assessment in July 2012

**Table S2.** Distribution of genetic risk estimates returned to 23andMe customers in the PGen Study

**Table S3.** Distribution of genetic risk estimates returned to Pathway Genomics customers in the PGen Study

**Table S4.** Sensitivity analyses: characterization of the outcome

**Table S5.** Sensitivity analyses: characterization of genetic risk results

**Table S6.** Sensitivity analyses: screening behaviors and missing data

**Table S1.** SNPs included in commercial personal genomic testing panels for cancer risk assessment in July 2012

| Cancer Site                  | Reference SNP Cluster ID    | Chromosomal Locus | Mapped Gene <sup>a</sup>  | MAF <sup>b</sup> | Odds Ratio <sup>c</sup> |
|------------------------------|-----------------------------|-------------------|---------------------------|------------------|-------------------------|
| <b>Breast</b>                |                             |                   |                           |                  |                         |
| <i>23andMe Only</i>          |                             |                   |                           |                  |                         |
|                              | rs4973768                   | 3p24.1            | <i>SLC4A7</i>             | 0.442            | 1.16                    |
|                              | rs9485370                   | 6q25.1            | NA                        | 0.201            | NA                      |
|                              | rs7222197                   | 17q22             | NA                        | 0.319            | NA                      |
| <i>Pathway Genomics Only</i> |                             |                   |                           |                  |                         |
|                              | rs10941679                  | 5p12              | <i>FGF10-AS1 – MRPS30</i> | 0.238            | 1.13                    |
|                              | rs889312                    | 5q11.2            | <i>RPL26P19 – MAP3K1</i>  | 0.300            | 1.13                    |
|                              | rs2046210                   | 6q25.1            | <i>CCDC170 – ESR1</i>     | 0.288            | 1.29                    |
|                              | rs6964587                   | 7q21.2            | NA                        | 0.388            | NA                      |
|                              | rs13281615                  | 8q24.21           | <i>LOC101930033</i>       | 0.454            | 1.08                    |
|                              | rs2981578                   | 10q26.13          | <i>FGFR2</i>              | 0.485            | 1.23                    |
|                              | rs12184413                  | 11q22.2           | NA                        | 0.102            | NA                      |
|                              | rs3817198                   | 11p15.5           | <i>LSP1; LOC102724536</i> | 0.327            | 1.07                    |
|                              | <i>1592delT*</i>            | 16p12.2           | <i>PALB2</i>              | -                | -                       |
| <i>Both Companies</i>        |                             |                   |                           |                  |                         |
|                              | rs13387042                  | 2q35              | <i>TNP1 – DIRC3</i>       | 0.438            | 1.2                     |
|                              | rs1045485                   | 2q33.1            | NA                        | 0.123            | NA                      |
|                              | rs1219648                   | 10q26.13          | <i>FGFR2</i>              | 0.465            | 1.2                     |
|                              | rs3803662                   | 16q12.1           | <i>CASC16</i>             | 0.248            | 1.28                    |
|                              | <i>1100delC<sup>d</sup></i> | 22q12.1           | <i>CHEK2</i>              | -                | -                       |
| <b>Prostate</b>              |                             |                   |                           |                  |                         |
| <i>23andMe Only</i>          |                             |                   |                           |                  |                         |
|                              | rs12621278                  | 2q31.1            | <i>ITGA6</i>              | 0.040            | 1.33                    |
|                              | rs17021918                  | 4q22.3            | <i>PDLIM5</i>             | 0.354            | 1.11                    |
|                              | rs1512268                   | 8p21.2            | <i>FAM60DP – NKX3-1</i>   | 0.420            | 1.18                    |
|                              | rs10505483                  | 8q24.21           | <i>SRRMIP1 – CCAT1</i>    | 0.031            | 1.73                    |
|                              | rs7127900                   | 11p15.5           | <i>MIR4686 – ASCL2</i>    | 0.235            | 1.22                    |
|                              | rs4430796                   | 17q12             | <i>HNF1B</i>              | 0.491            | 1.22                    |
|                              | rs8102476                   | 19q13.2           | <i>DPF1 – PPP1R14A</i>    | 0.496            | 1.12                    |
| <i>Pathway Genomics Only</i> |                             |                   |                           |                  |                         |
|                              | rs5945572                   | Xp11.22           | <i>CXorf67 – NUDT11</i>   | 0.426            | 1.23                    |
|                              | rs721048                    | 2p15              | <i>EHBPI</i>              | 0.137            | 1.15                    |
|                              | rs2660753                   | 3p12.1            | <i>PPATP1 – LINC00506</i> | 0.102            | 1.18                    |
|                              | rs401681                    | 5p15.22           | <i>CLPTIML</i>            | 0.434            | NA                      |
|                              | rs9364554                   | 6q25.3            | <i>SLC22A3</i>            | 0.274            | 1.17                    |
|                              | rs6465657                   | 7q21.3            | <i>LMTK2</i>              | 0.491            | 1.12                    |
|                              | rs10090154                  | 8q24.21           | <i>CASC8 – CASC11</i>     | 0.055            | 1.68                    |
|                              | rs6983561                   | 8q24.21           | <i>SRRMIP1 – CCAT1</i>    | 0.023            | 1.87                    |
|                              | rs1571801                   | 9q33.3            | NA                        | 0.290            | NA                      |
|                              | rs4962416                   | 10q26.13          | <i>CTBP2</i>              | 0.252            | 1.17                    |
|                              | rs7931342                   | 11q13.3           | <i>MIR3164 – MYEOV</i>    | 0.469            | 1.19                    |
|                              | rs7501939                   | 17q12             | <i>HNF1B</i>              | 0.434            | 1.41                    |
|                              | rs9623117                   | 22q13.1           | <i>TNRC6B</i>             | 0.221            | 1.18                    |
| <i>Both Companies</i>        |                             |                   |                           |                  |                         |
|                              | rs10486567                  | 7p15.2            | <i>JAZF1</i>              | 0.248            | 1.12                    |

|                              |            |          |                              |       |      |
|------------------------------|------------|----------|------------------------------|-------|------|
|                              | rs1447295  | 8q24.21  | <i>CASC8</i>                 | 0.071 | 1.43 |
|                              | rs6983267  | 8q24.21  | <i>CCAT2; CASC8</i>          | 0.487 | 1.26 |
|                              | rs10993994 | 10q11.23 | <i>MSMB</i>                  | 0.341 | 1.16 |
|                              | rs1859962  | 17q24.3  | <i>CASC17</i>                | 0.473 | 1.2  |
| <b>Colorectum</b>            |            |          |                              |       |      |
| <i>Pathway Genomics Only</i> |            |          |                              |       |      |
|                              | rs16892766 | 8q23.3   | <i>LINC00536 – EIF3H</i>     | 0.106 | 1.27 |
|                              | rs10795668 | 10p14    | <i>RNA5SP299 – LINC00709</i> | 0.326 | 1.12 |
|                              | rs4444235  | 14q22.2  | <i>BMP4</i>                  | 0.442 | 1.11 |
|                              | rs9929218  | 16q22.1  | <i>CDH1</i>                  | 0.295 | 1.1  |
|                              | rs10411210 | 19q13.11 | <i>RHPN2</i>                 | 0.084 | 1.15 |
|                              | rs961253   | 20p12.3  | <i>FGFR3P3 – CASC20</i>      | 0.403 | 1.12 |
| <i>Both Companies</i>        |            |          |                              |       |      |
|                              | rs6983267  | 8q24.21  | <i>CCAT2; CASC8</i>          | 0.487 | 1.27 |
|                              | rs3802842  | 11q23.1  | <i>COLCA2; COLCA1</i>        | 0.235 | 1.11 |
|                              | rs4779584  | 15q13.3  | <i>SCG5 – GREM1</i>          | 0.168 | 1.23 |
|                              | rs4939827  | 18q21.1  | <i>SMAD7</i>                 | 0.473 | 1.16 |
| <b>Lung</b>                  |            |          |                              |       |      |
| <i>23andMe Only</i>          |            |          |                              |       |      |
|                              | rs8034191  | 15q25.1  | <i>HYKK</i>                  | 0.418 | 1.3  |
| <i>Pathway Genomics Only</i> |            |          |                              |       |      |
|                              | rs2736100  | 5p15.33  | <i>TERT</i>                  | 0.473 | 1.12 |
|                              | rs3117582  | 6p21.33  | <i>BAG6; APOM</i>            | 0.080 | 1.24 |
|                              | rs1051730  | 15q25.1  | <i>CHRNA3</i>                | 0.385 | 1.35 |

Abbreviations: GWAS, genome-wide association study; MAF, minor allele frequency; NA, not available; rsID, reference SNP cluster ID; SNP, single nucleotide polymorphism

<sup>a</sup> Genes mapped to the strongest SNP. If the SNP is located within a gene, that gene is listed. If the SNP is intergenic, the upstream and downstream genes are listed, separated by a hyphen. Source: National Human Genome Research Institute Catalog of Published GWAS (<http://www.genome.gov/26525384>)

<sup>b</sup> Minor allele frequency reported in Utah residents from Northern and Western European ancestry from the CEPH collection. Source: International HapMap Project, Genome Browser release #28 (<http://hapmap.ncbi.nlm.nih.gov/>)

<sup>c</sup> From the 1<sup>st</sup> published GWAS on the association between the SNP and the relevant cancer listed in the NHGRI Catalog of Published GWAS.

<sup>d</sup> Rare variants (MAF < 0.02), for which only the mutation, location, and gene are provided.

**Table S2.** Distribution of genetic risk estimates returned to 23andMe customers in the PGen Study

|                                                            | Breast<br>n = 351      | Prostate<br>n = 268    | Colorectal<br>n = 654                                                                                | Lung<br>n = 653          |
|------------------------------------------------------------|------------------------|------------------------|------------------------------------------------------------------------------------------------------|--------------------------|
| <b>Baseline 10-year Absolute Risks<sup>a</sup></b>         |                        |                        |                                                                                                      |                          |
| Estimate (n)                                               | 0.09 (2)<br>0.14 (349) | 0.11 (2)<br>0.18 (266) | 0.03 (2) <sup>b</sup><br>0.04 (362) <sup>b</sup><br>0.05 (2) <sup>c</sup><br>0.06 (288) <sup>c</sup> | 0.06 (365)<br>0.08 (288) |
| <b>Genetics-adjusted Relative Risk<sup>c</sup></b>         |                        |                        |                                                                                                      |                          |
| Mean ± SD                                                  | 0.98 ± 0.24            | 1.08 ± 0.42            | 1.05 ± 0.23                                                                                          | 0.95 ± 0.17              |
| Range                                                      | 0.52 – 1.80            | 0.19 – 2.34            | 0.62 – 1.92                                                                                          | 0.81 – 1.38              |
| 10 <sup>th</sup> /90 <sup>th</sup> Percentile              | 0.70 / 1.33            | 0.60 / 1.69            | 0.75 / 1.37                                                                                          | 0.81 / 1.37              |
| <b>Genetics-adjusted 10-year Absolute Risk<sup>d</sup></b> |                        |                        |                                                                                                      |                          |
| Mean ± SD                                                  | 0.13 ± 0.03            | 0.19 ± 0.08            | 0.05 ± 0.01                                                                                          | 0.07 ± 0.02              |
| Range                                                      | 0.07 – 0.24            | 0.03 – 0.42            | 0.02 – 0.10                                                                                          | 0.05 – 0.12              |
| 10 <sup>th</sup> /90 <sup>th</sup> Percentile              | 0.09 / 0.18            | 0.11 / 0.30            | 0.03 / 0.07                                                                                          | 0.05 / 0.09              |

<sup>a</sup> Baseline 10-year risks were assigned to each consumer by 23andMe prior to undergoing genetic testing and are age-adjusted but not adjusted for competing risks.

<sup>b</sup> Female participants (estimates conditioned on biological sex)

<sup>c</sup> Male participants (estimates conditioned on biological sex)

<sup>d</sup> Genetics-adjusted risks are also age-adjusted (and conditioned on biological sex in the case of colorectal cancer) but are not adjusted for competing risks.

**Table S3.** Distribution of cancer genetic risk estimates returned to Pathway Genomics customers in the PGen Study

|                                        | Breast<br>n = 290 | Prostate<br>n = 115 | Colorectal<br>n = 415 | Lung<br>n = 414 |
|----------------------------------------|-------------------|---------------------|-----------------------|-----------------|
| Learn More / Average Risk              | 280 (96.6%)       | 114 (99.1%)         | 319 (76.9%)           | 293 (70.8%)     |
| Take Action / Increased Susceptibility | 10 (3.5%)         | 1 (0.87%)           | 96 (23.1%)            | 121 (29.2%)     |

**Table S4.** Sensitivity analyses: characterization of the outcome

| $\Delta$ PR-2W | Breast (n = 576)                    |          | Prostate (n = 354)                  |         | Colorectal (n = 969)                |         | Lung <sup>a</sup> (n = 966) |         |
|----------------|-------------------------------------|----------|-------------------------------------|---------|-------------------------------------|---------|-----------------------------|---------|
|                | Odds Ratio <sup>a</sup><br>(95% CI) | p-value  | Odds Ratio <sup>a</sup><br>(95% CI) | p-value | Odds Ratio <sup>a</sup><br>(95% CI) | p-value | Odds Ratio                  | p-value |
| -4             | n/a <sup>c</sup>                    | --       | n/a                                 | --      | 1.70<br>(<0.001, >999.99)           | 0.99    | 2.10<br>(<0.001, >999.99)   | 0.95    |
| -3             | <0.001<br>(<0.001, >999.99)         | 0.89     | 0.006<br>(<0.001, >999.99)          | 0.91    | 0.35<br>(0.02, 3.64)                | 0.38    | <0.001<br>(<0.001, >999.99) | 0.94    |
| -2             | 0.41<br>(0.10, 1.58)                | 0.19     | 0.19<br>(0.02, 1.71)                | 0.14    | 0.09<br>(0.02, 0.46)                | 0.0037  | 0.45<br>(0.12, 1.69)        | 0.24    |
| -1             | 0.18<br>(0.05, 0.58)                | 0.0041   | 0.69<br>(0.28, 1.7)                 | 0.42    | 0.47<br>(0.28, 0.78)                | 0.0034  | 0.55 (0.31, 0.97)           | 0.0391  |
| 0              | Ref.                                | --       | Ref.                                | --      | Ref.                                | --      | Ref.                        | --      |
| +1             | 14.3<br>(5.8, 35.2)                 | < 0.0001 | 9.67<br>(3.97, 23.5)                | <.0001  | 3.78<br>(2.51, 5.70)                | <.0001  | 1.99<br>(1.30, 3.06)        | 0.0017  |
| +2             | 24.3<br>(4.43, 133.42)              | 0.0002   | 83.7<br>(14.2, 494.2)               | <.0001  | 9.81<br>(4.49, 21.4)                | <.0001  | 4.22<br>(2.15, 8.27)        | <.0001  |
| +3             | >999.99<br>(29.2, >999.99)          | 0.0014   | >999.99<br>(2.89, >999.99)          | 0.0342  | >999.99<br>(<0.001, >999.99)        | 0.55    | 31.37<br>(6.79, 144.82)     | <.0001  |
| +4             | n/a                                 | --       | >999.99<br>(<0.001, >999.99)        | 0.67    | n/a                                 | --      | n/a                         | --      |

Abbreviations: CI, confidence interval; n/a, not applicable; Ref., reference category;  $\Delta$ PR-2W, change in perceived risk from baseline to 2-week follow-up

<sup>a</sup> Results from multivariate generalized logistic regression for change in perceived risk from baseline to 2-week follow-up, adjusted for baseline perceived risk, age, gender, race/ethnicity, education, and company

<sup>b</sup> Multivariate lung cancer analyses additionally adjusted for smoking status.

<sup>c</sup> Results marked n/a indicate that no participants reported a change in perceived risk of this magnitude

**Table S5.** Sensitivity analyses: characterization of genetic risk results

|                               | Breast (n = 310)                     |                     | Prostate (n = 243)                   |                     | Colorectal (n = 581)                 |                     | Lung (n = 579)                           |                     |
|-------------------------------|--------------------------------------|---------------------|--------------------------------------|---------------------|--------------------------------------|---------------------|------------------------------------------|---------------------|
|                               | $\beta \pm \text{SE}^a$<br>(p-value) | Mean<br>RR $\pm$ SD | $\beta \pm \text{SE}^a$<br>(p-value) | Mean<br>RR $\pm$ SD | $\beta \pm \text{SE}^a$<br>(p-value) | Mean<br>RR $\pm$ SD | $\beta \pm \text{SE}^{a,b}$<br>(p-value) | Mean<br>RR $\pm$ SD |
| <b>Dichotomous</b>            |                                      |                     |                                      |                     |                                      |                     |                                          |                     |
| RR $\leq$ 1.2                 | ---                                  | 0.90 $\pm$ 0.16     | ---                                  | 0.85 $\pm$ 0.23     | ---                                  | 0.95 $\pm$ 0.15     | ---                                      | 0.90 $\pm$ 0.08     |
| RR $>$ 1.2                    | 0.76 $\pm$ 0.11<br>( $<$ .0001)      | 1.37 $\pm$ 0.13     | 0.98 $\pm$ 0.12<br>( $<$ .0001)      | 1.57 $\pm$ 0.31     | 0.52 $\pm$ 0.07<br>( $<$ .0001)      | 1.36 $\pm$ 0.16     | 0.47 $\pm$ 0.10<br>( $<$ .0001)          | 1.38 $\pm$ 0.005    |
| <b>4-Category (Quartiles)</b> |                                      |                     |                                      |                     |                                      |                     |                                          |                     |
| Quartile 1                    | -0.23 $\pm$ 0.12<br>(0.06)           | 0.71 $\pm$ 0.07     | -0.62 $\pm$ 0.14<br>( $<$ .0001)     | 0.60 $\pm$ 0.24     | -0.23 $\pm$ 0.08<br>(0.0059)         | 0.78 $\pm$ 0.08     | -0.03 $\pm$ 0.07<br>(0.68)               | 0.81 $\pm$ 0.002    |
| Quartile 2                    | ---                                  | 0.88 $\pm$ 0.04     | ---                                  | 0.89 $\pm$ 0.06     | ---                                  | 1.00 $\pm$ 0.06     | ---                                      | 0.97 $\pm$ 0.001    |
| Quartile 3                    | -0.01 $\pm$ 0.13<br>(0.92)           | 1.03 $\pm$ 0.06     | 0.18 $\pm$ 0.14<br>(0.20)            | 1.13 $\pm$ 0.08     | 0.004 $\pm$ 0.09<br>(0.96)           | 1.12 $\pm$ 0.06     | 0.45 $\pm$ 0.10<br>( $<$ .0001)          | 1.38 $\pm$ 0.005    |
| Quartile 4                    | 0.45 $\pm$ 0.12<br>(0.0003)          | 1.30 $\pm$ 0.14     | 0.87 $\pm$ 0.15<br>( $<$ .0001)      | 1.65 $\pm$ 0.29     | 0.45 $\pm$ 0.08<br>( $<$ .0001)      | 1.36 $\pm$ 0.16     | n/a <sup>c</sup>                         | n/a <sup>c</sup>    |
| Trend Test                    | 0.21 $\pm$ 0.04<br>( $<$ .0001)      | 0.98 $\pm$ 0.24     | 0.46 $\pm$ 0.05<br>( $<$ .0001)      | 1.07 $\pm$ 0.42     | 0.21 $\pm$ 0.03<br>( $<$ .0001)      | 1.06 $\pm$ 0.24     | 0.18 $\pm$ 0.05<br>(0.0003)              | 0.96 $\pm$ 0.17     |

Abbreviations: RR, relative risk; SD, standard deviation;  $\Delta\text{PR}_{2w}$ , change in perceived risk from baseline to two weeks post-results

<sup>a</sup> Results from multivariate linear regression for change in perceived risk from baseline to 2-week follow-up, adjusted for baseline perceived risk, age, gender, race/ethnicity, education, and company

<sup>b</sup> Multivariate lung cancer analyses additionally adjusted for smoking status.

<sup>c</sup> Due to the structure of the data, lung cancer genetic risk estimates could not be divided into quartiles, and were instead analyzed as tertiles.

**Table S6.** Sensitivity analyses: screening behaviors and missing data

|                                                                              | Breast               | Prostate              | Colorectal          | Lung <sup>d</sup> |
|------------------------------------------------------------------------------|----------------------|-----------------------|---------------------|-------------------|
| Multivariate Linear Regression <sup>a</sup> , No Screeners <sup>b</sup> :    |                      |                       |                     |                   |
| Change in Perceived Risk: Baseline to 6M                                     | n = 254              | n = 265               | n = 860             | n = 931           |
| <i>Elevated Risk</i> Result: LS Mean (95% CI)                                | 0.62 (0.30, 0.93)    | 0.62 (0.40, 0.84)     | 0.32 (0.22, 0.42)   | 0.58 (0.44, 0.72) |
| <i>Average Risk</i> Result: LS Mean (95% CI)                                 | -0.20 (-0.08, -0.32) | -0.11 (-0.23, -0.002) | -0.03 (-0.08, 0.03) | 0.22 (0.14, 0.31) |
| LS Mean Difference (95% CI)                                                  | 0.82 (0.49, 1.14)    | 0.74 (0.49, 0.98)     | 0.35 (0.23, 0.46)   | 0.36 (0.23, 0.50) |
| p-value <sub>Difference</sub>                                                | <.0001               | <.0001                | <.0001              | <.0001            |
| Multivariate Linear Regression <sup>a</sup> , IPW for Censoring <sup>c</sup> |                      |                       |                     |                   |
| Change in Perceived Risk: Baseline to 6M                                     |                      |                       |                     |                   |
| Censored Participants, n (%)                                                 | 84 (12.9)            | 45 (11.6)             | 135 (12.5)          | 135 (12.5)        |
| Non-censored Participants, n (%)                                             | 565 (87.1)           | 343 (88.4)            | 947 (87.5)          | 945 (87.5)        |
| <i>Elevated Risk</i> Result: LS Mean (95% CI)                                | 0.53 (0.24, 0.82)    | 0.51 (0.27, 0.74)     | 0.33 (0.23, 0.44)   | 0.57 (0.42, 0.73) |
| <i>Average Risk</i> Result: LS Mean (95% CI)                                 | -0.15 (-0.08, -0.21) | -0.14 (-0.23, -0.05)  | -0.04 (-0.09, 0.02) | 0.22 (0.13, 0.30) |
| LS Mean Difference (95% CI)                                                  | 0.68 (0.38, 0.97)    | 0.64 (0.39, 0.90)     | 0.37 (0.25, 0.49)   | 0.36 (0.20, 0.51) |
| p-value <sub>Difference</sub>                                                | <.0001               | <.0001                | <.0001              | <.0001            |

Abbreviations: 6M, 6-month follow-up; LS, least squares adjusted; CI, confidence interval; IPW, Inverse Probability Weighting

<sup>a</sup> Adjusted for baseline perceived risk, age, gender, race/ethnicity, education, and company

<sup>b</sup> Screening behaviors included mammography, breast MRI, and clinical breast exam for breast cancer; prostate-specific antigen (PSA) testing for prostate cancer; colonoscopy for colorectal cancer; and unspecified lung cancer screening.

<sup>c</sup> Censoring due to missing data for perceived risk at 6M

<sup>d</sup> Multivariate lung cancer analyses additionally adjusted for smoking status
